# Supplementary material for: Role of personalized predictions for people with prediabetes: disseminating patient-centered estimates of benefit
Source: bioRxiv or medRxiv preprint supplement (doi:10.1101/2024.12.03.24318396), 2024-12-21

# Role of personalized predictions for people with prediabetes: disseminating patient-centered estimates of benefit

Natalia Olchanski, PhD, MS<sup>1,2</sup>; Elizabeth L. Ciemins, PhD, MPH, MA<sup>3</sup>; John Cuddeback, MD, PhD<sup>3</sup>; Francis Colangelo, MD, MS-HQS, FACP<sup>4</sup>; Carolyn Koenig, MD<sup>5</sup>; David M. Kent, MD, MS<sup>2</sup>

<sup>1</sup>Center for the Evaluation of Value and Risk in Health (CEVR), Tufts Medical Center, Boston, MA, USA

<sup>2</sup>Predictive Analytics and Comparative Effectiveness Center, Tufts Medical Center, Boston, MA, USA

<sup>3</sup>American Medical Group Association (AMGA), Alexandria, VA, USA

<sup>4</sup>Premier Medical Associates and Allegheny Health Network, Pittsburgh, PA, USA

<sup>5</sup>Mercy, St. Louis, MO, USA

## Corresponding author

Natalia Olchanski, PhD, MS

Assistant Research Professor

Institute for Clinical Research and Health Policy Studies

Tufts Medical Center

800 Washington St, Box 63

Boston, MA 02111

[Natalia.Olchanski@tuftsmedicine.org](mailto:Natalia.Olchanski@tuftsmedicine.org)

## Supplementary Appendix

|                                                     |    |
|-----------------------------------------------------|----|
| Supplement 1. Patient Survey.....                   | 2  |
| Supplement 2. Provider Surveys.....                 | 4  |
| Supplement 3. Premier Patient Survey Results .....  | 9  |
| Supplement 4. Premier Provider Survey Results ..... | 15 |

## Supplement 1. Patient Survey

**Pre- and Post- Dissemination Survey: PATIENTS**

1) What type of health care provider do you regularly see? Check one of the following:

- Primary care physician (a doctor that provides ongoing general care)
- Specialist (such as a heart doctor or diabetes doctor)
- Other, please explain: \_\_\_\_\_

2) Has your doctor or nurse ever told you that you were at risk for getting diabetes? For example, they might have told you that you have high blood sugar, which may eventually lead to getting diabetes.

Yes                      No                      Unsure

*If your answer to #2 was yes, please continue:*

3) If your doctor or nurse told you that you had a certain amount of risk for getting diabetes, what was the level of risk? Check one of the following:

- Low
- Medium
- High
- Percentage: \_\_\_\_\_%
- Other, please explain: \_\_\_\_\_
- Did not specify a level of risk

4) How would you prefer to get information about your risk of diabetes? Check all that apply:

- Talking to your doctor
- Talking to your nurse
- Talking to another health care professional (such as a dietitian, pharmacist, or social worker)
- Patient portal through your doctor's office
- Getting information online
- Reading materials
- Cell phone app
- Other, please explain: \_\_\_\_\_

5) Did your doctor or nurse mention or explain any tool(s) he or she used to figure out your level of risk for diabetes? For example, they might have used a computer program or an online calculator.

Yes                      No                      Unsure                      N/A (no risk discussion with provider)

6) On a scale from 1 to 5 (where 1 = "not at all confident" and 5 = "very confident"), how confident are you that you understand your risk of getting diabetes?

Not at all confident    1                      2                      3                      4                      5    Very confident

7) If your doctor or nurse did use a tool, did it help you understand your risk?

- Yes, it helped me to better understand my risk
- No, it did not make any difference
- Unsure
- N/A (no calculator used)

8) Did your doctor or nurse recommend that you do anything to help avoid diabetes? For example, they might have suggested that you make lifestyle changes (such as going to the gym or starting a diet) or start medication.

Yes                      No                      Unsure                      N/A

9) Which action(s) did your doctor or nurse recommend? Check all that apply:

- Diet
- Exercise
- Medication (such as metformin)
- Diabetes Prevention Program (DPP)
- Other programs, please specify: \_\_\_\_\_
- N/A (doctor/nurse did not recommend any actions)

10) Did you (or did you plan to) follow your doctor or nurse's advice and take any of the above actions? Check one of the following:

- No, I do not intend to in the next 6 months
- No, but I plan to in the next 6 months
- Yes, I have taken action at least once in the past month
- N/A (doctor/nurse did not recommend any actions)

11) If you did not take any action, why not? Check all that apply:

- I am planning to, but have not yet made any changes
- I did not believe I was at risk
- I believed I was at risk, but have not been ready or able to make changes
- I was unsure about my risk
- I could not afford to pay for medication or an organized lifestyle program
- I do not like to take medication
- I do not like to exercise, or it's too much work
- I am not worried about getting diabetes
- Other reason, please explain: \_\_\_\_\_
- N/A (doctor/nurse did not recommend any actions)

12) On a scale from 1 to 5 (where 1 = "not at all satisfied" and 5 = "very satisfied"), how satisfied were you with the experience of talking to your provider about your risk of diabetes?

1                      2                      3                      4                      5                      N/A  
 Not at all satisfied                      Very Satisfied

## Supplement 2. Provider Surveys

### Pre-Dissemination Survey: PROVIDERS

For questions 1-4, please indicate how confident you are on a scale from 1 to 5, where 1 = “not at all confident” and 5 = “very confident.”

#### **How confident are you in your ability to:**

- 1) Estimate the average risk of diabetes progression for your patients with prediabetes?

Not at all confident    1                      2                      3                      4                      5    Very confident

- 2) Identify clinical factors in your prediabetes patients that could increase or decrease their risk of diabetes progression?

Not at all confident    1                      2                      3                      4                      5    Very confident

- 3) Directly communicate the degree of benefit a prediabetes patient should anticipate if they attend a DPP lifestyle modification program or take metformin?

Not at all confident    1                      2                      3                      4                      5    Very confident

- 4) Tailor your recommendations for diabetes prevention to the general risk of an individual prediabetes patient?

Not at all confident    1                      2                      3                      4                      5    Very confident

For questions 5-7, please indicate how frequently you perform the indicated task.

#### **How often do you:**

- 5) Inform prediabetes patients of their level of risk (low, medium, high, or numeric) of developing diabetes?

None of the time            Some of the time            Most of the time            All of the time

- 6) Recommend specific diabetes prevention interventions (lifestyle modification program or metformin) to prediabetes patients?

None of the time            Some of the time            Most of the time            All of the time

- 7) Refer patients to the Diabetes Prevention Program (DPP)?

None of the time            Some of the time            Most of the time            All of the time

Please complete the rest of the survey (#8).

- 8) How do you believe your patients would prefer to get information about their risk of diabetes?

- Talking to their doctor
- Talking to their nurse
- Talking to another health care professional, e.g., dietitian, pharmacist, social worker
- Patient portal through their doctor's office
- Getting information online
- Reading materials
- Cell phone app
- Other, please explain: \_\_\_\_\_

**Post-Dissemination Survey: PROVIDERS**

*For questions 1-5, please indicate how confident you are on a scale from 1 to 5, where 1 = “not at all confident” and 5 = “very confident.”*

***How confident are you in your ability to:***

1) Estimate the average risk of diabetes progression for your patients with prediabetes?

Not at all confident    1                      2                      3                      4                      5    Very confident

2) Identify clinical factors in your prediabetes patients that could increase or decrease their risk of diabetes progression?

Not at all confident    1                      2                      3                      4                      5    Very confident

3) Directly communicate the degree of benefit a prediabetes patient should anticipate if they attend a DPP lifestyle modification program or take metformin?

Not at all confident    1                      2                      3                      4                      5    Very confident

4) Tailor your recommendations for diabetes prevention to the general risk of an individual prediabetes patient?

Not at all confident    1                      2                      3                      4                      5    Very confident

5) Using or tailoring the tool to convey information about a prediabetes patient’s risk of diabetes progression?

Not at all confident    1                      2                      3                      4                      5    Very confident

*For questions 6-8, please indicate how frequently you perform the indicated task.*

***How often do you:***

6) Inform your prediabetes patients of their level of risk (low, medium, high, or numeric) of developing diabetes?

None of the time              Some of the time              Most of the time              All of the time

7) Recommend specific diabetes prevention interventions (lifestyle modification or metformin) to your prediabetes patients?

None of the time              Some of the time              Most of the time              All of the time

8) Refer patients to the Diabetes Prevention Program (DPP)?

None of the time              Some of the time              Most of the time              All of the time

Please complete the rest of the survey (#9-20).

9) Did you receive information or training on how to use the Tufts DPP tool?

Yes                      No                      Unsure

10) Do you feel competent in the use of the Tufts DPP tool?

Yes                      No                      Unsure

11) How often could you use the tool to screen patients at risk for diabetes?

None of the time              Some of the time              Most of the time              All of the time

12) How often have you used the tool to screen patients at risk for diabetes?

None of the time              Some of the time              Most of the time              All of the time

13) To what degree did using the tool heighten your awareness of the heterogeneity of risk of diabetes among prediabetes patients?

Not at all                      A little                      Some                      A great deal

14) To what degree did using the tool heighten your awareness of heterogeneity of individual benefit from specific therapies among prediabetes patients?

Not at all                      A little                      Some                      A great deal

15) Has using this tool affected the quality of your encounters with patients with prediabetes?

Yes, improved quality                      No effect                      Yes, decreased quality

16) In your opinion, has using this tool influenced patients' decisions to adhere to medication or enroll in the DPP?

Yes, positive impact                      No effect                      Yes, negative impact

17) Has using this tool impacted your work protocols and flow when seeing patients with prediabetes?

Yes, positive impact                      No effect                      Yes, negative impact

18) To what degree has this tool influenced how likely you are to recommend a diabetes prevention intervention (DPP lifestyle intervention or metformin) for prediabetes patients?

Not at all                      A little                      Some                      A great deal

19) To what degree has this tool influenced your decisions regarding which prediabetes patients you will personally maintain and refer to a diabetes prevention intervention (DPP lifestyle intervention or metformin)?

Not at all

A little

Some

A great deal

20) How do you believe your patients would prefer to get information about their risk of diabetes?

- Talking to their doctor
- Talking to their nurse
- Talking to another health care professional, e.g., dietitian, pharmacist, social worker
- Patient portal through their doctor's office
- Getting information online
- Reading materials
- Cell phone app
- Other, please explain: \_\_\_\_\_



Supplement 3. Premier Patient Survey Results

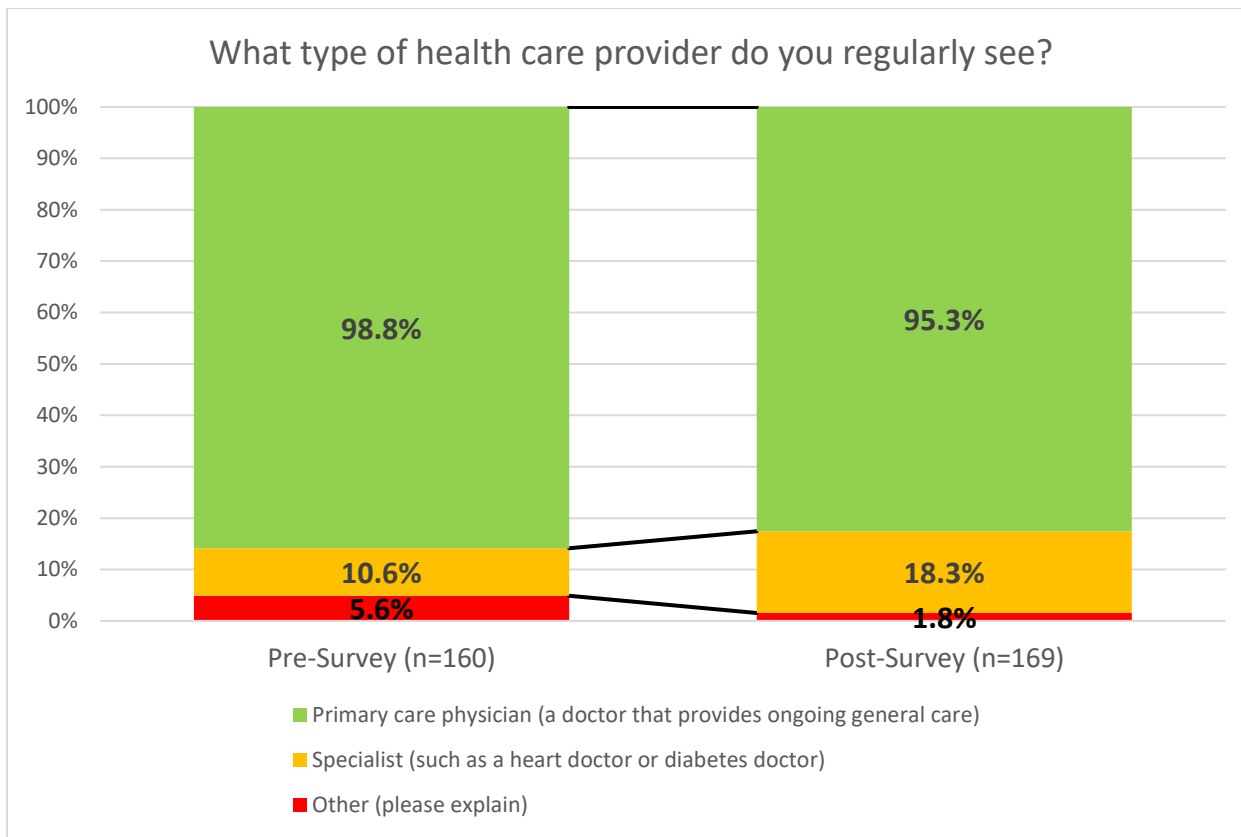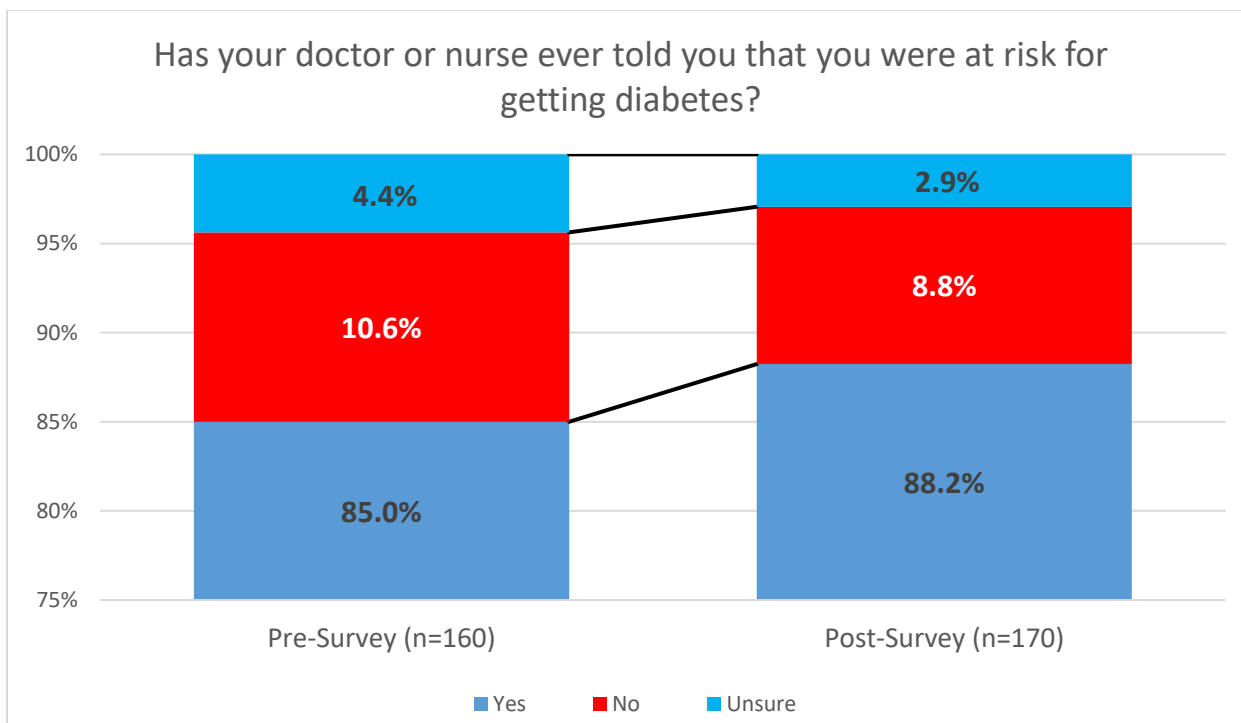

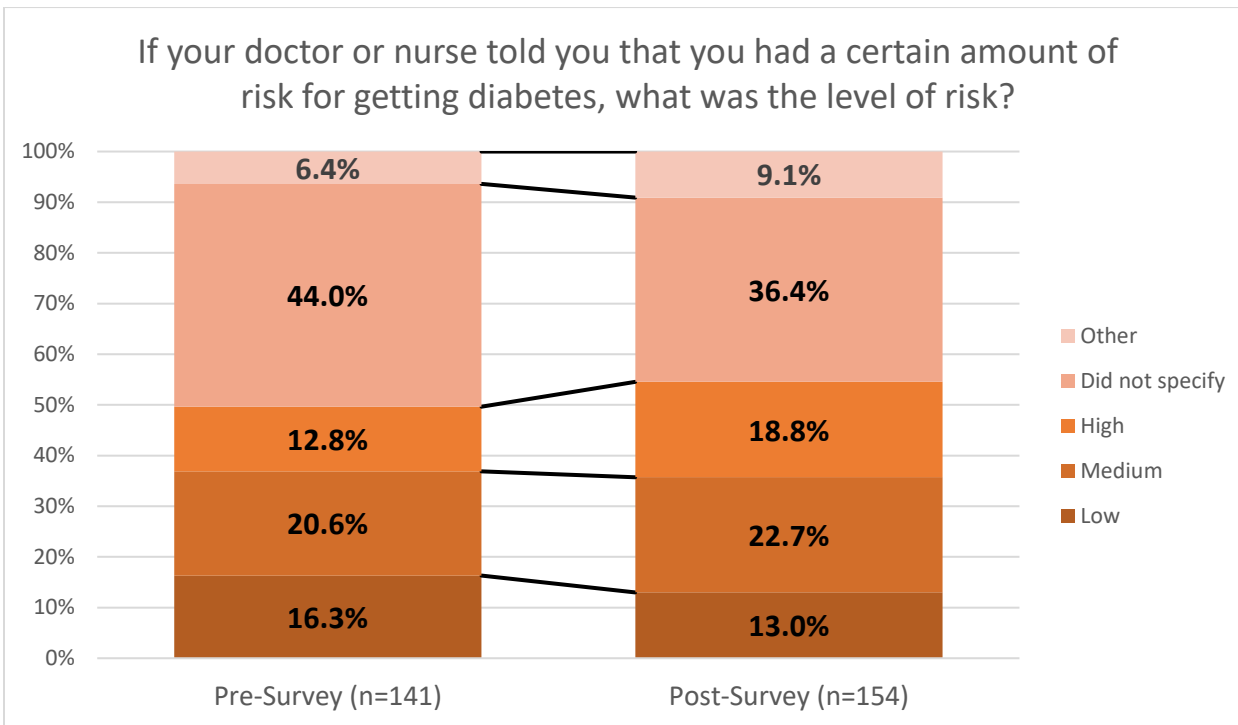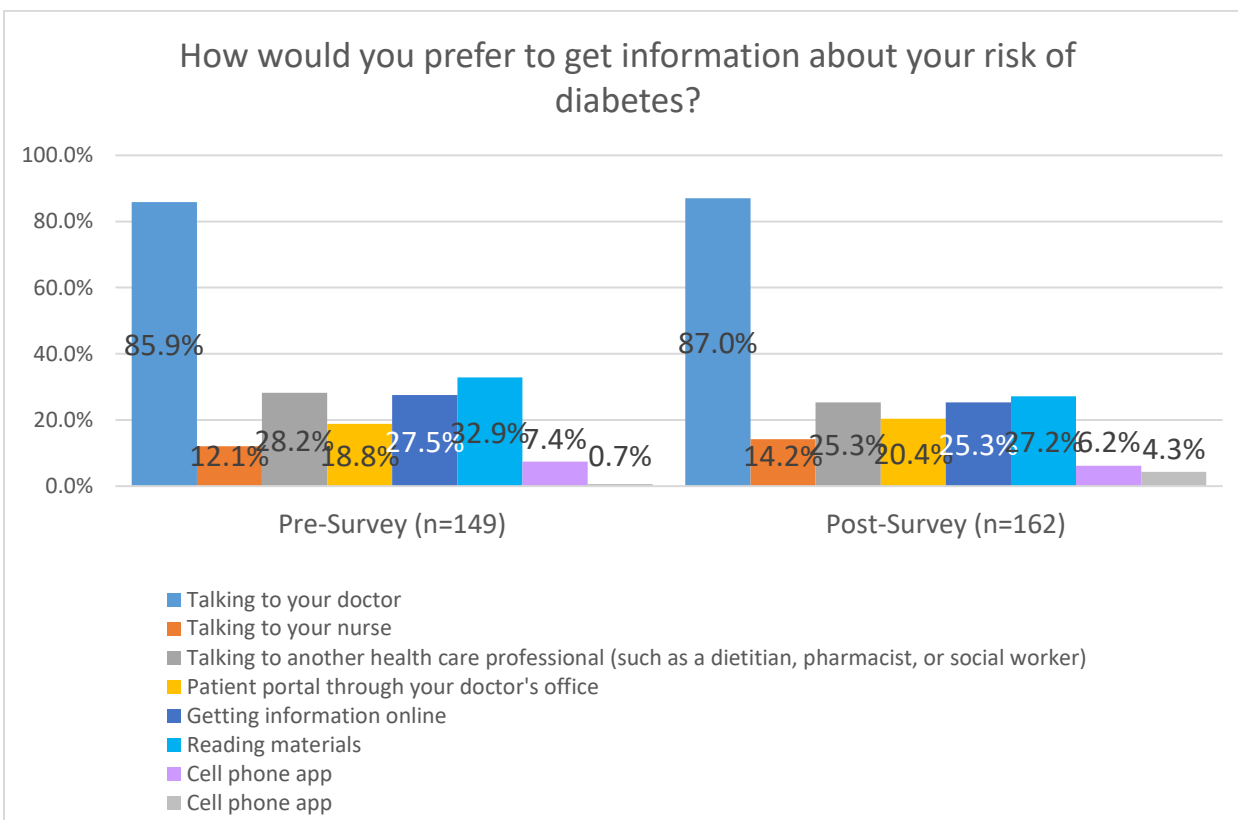

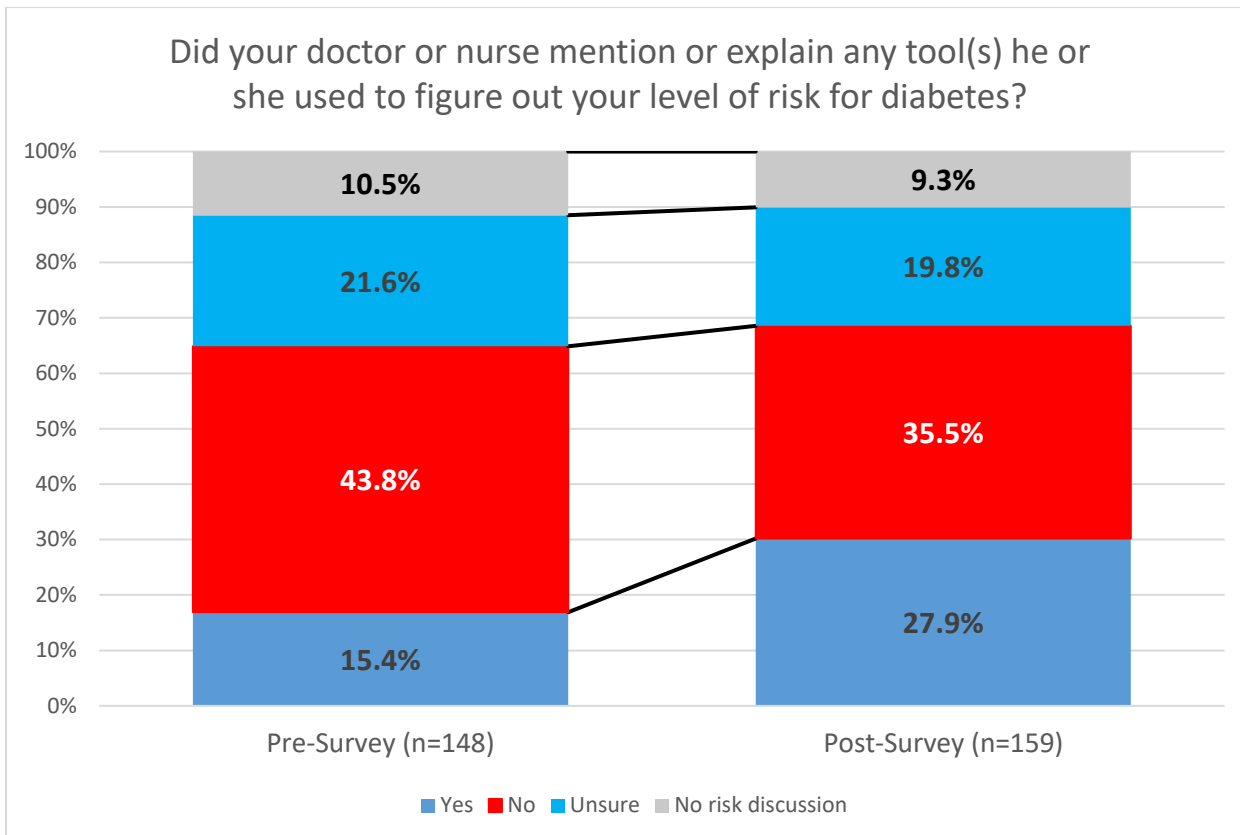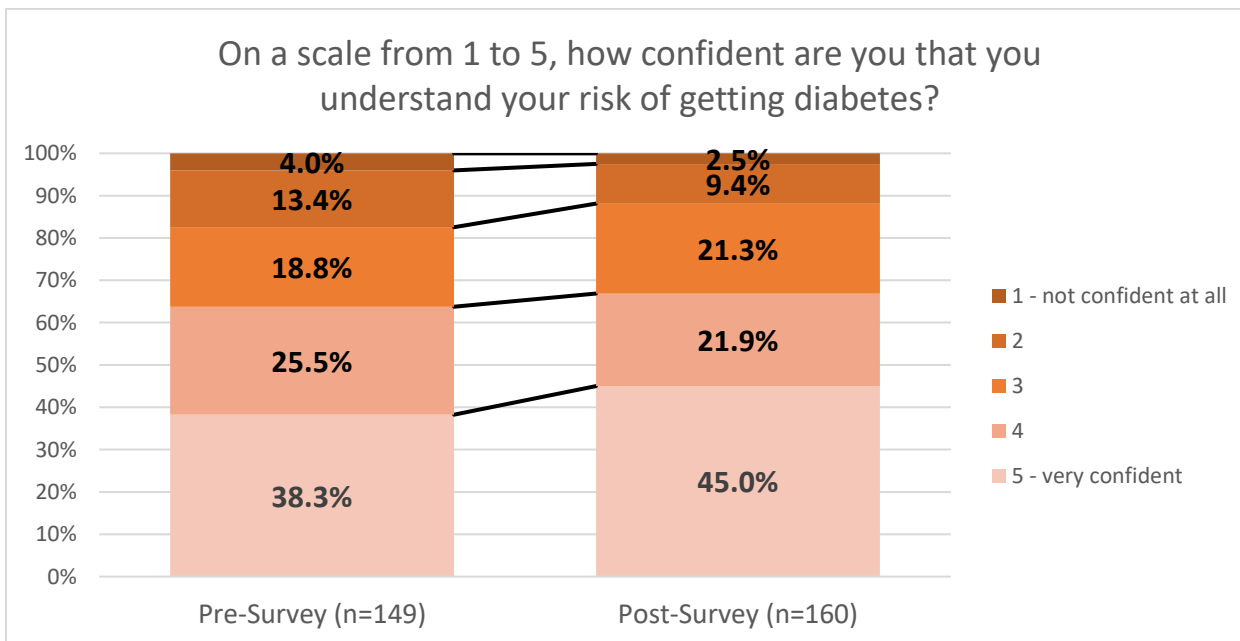

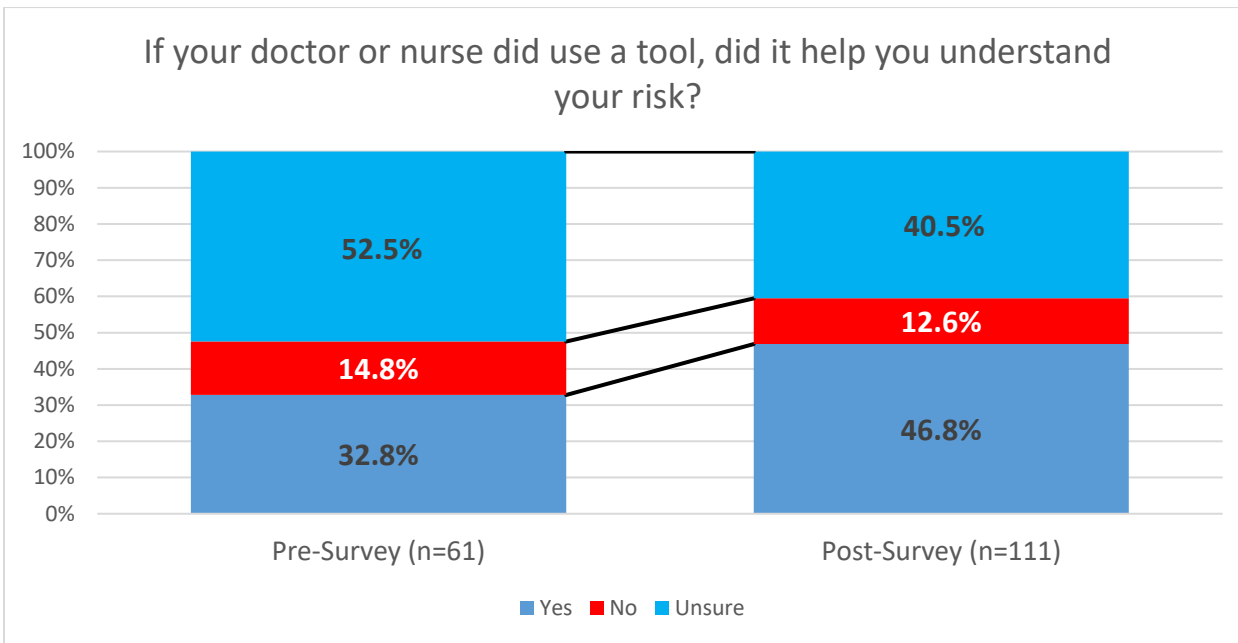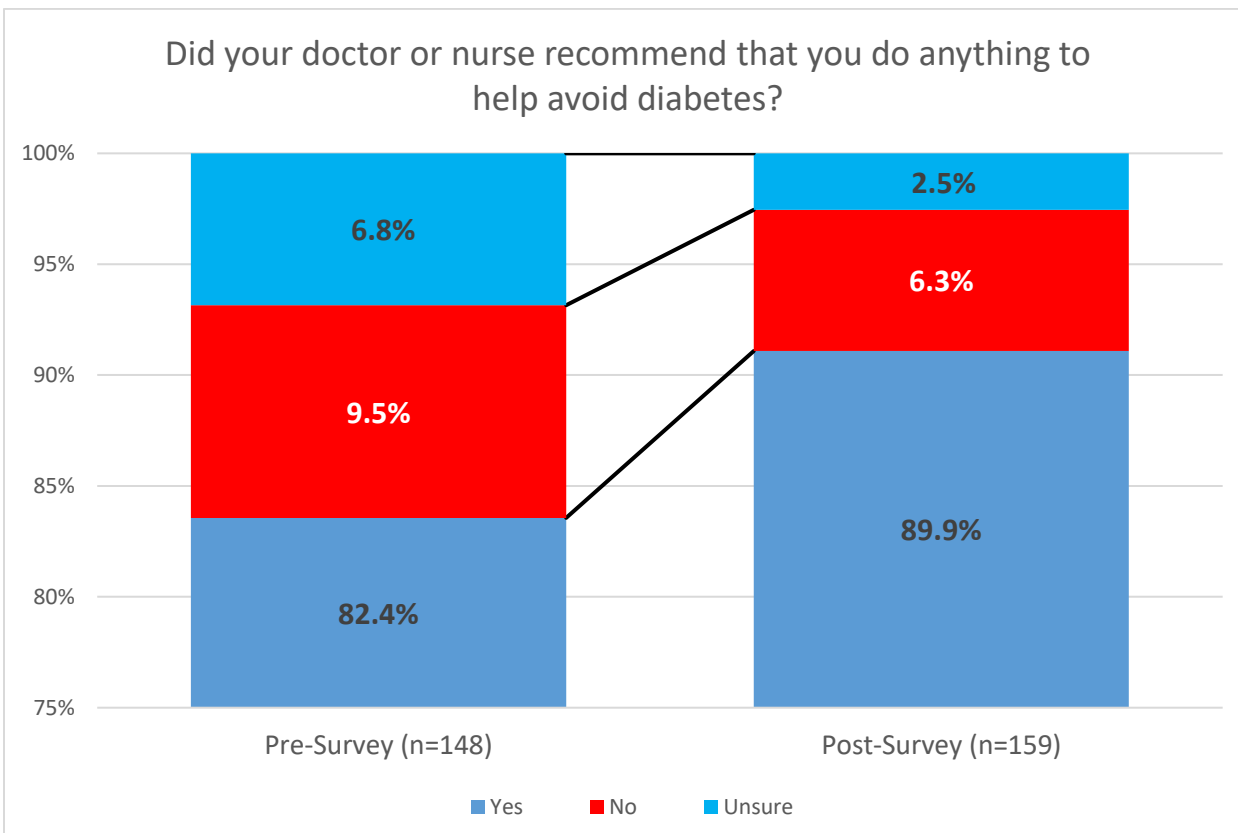

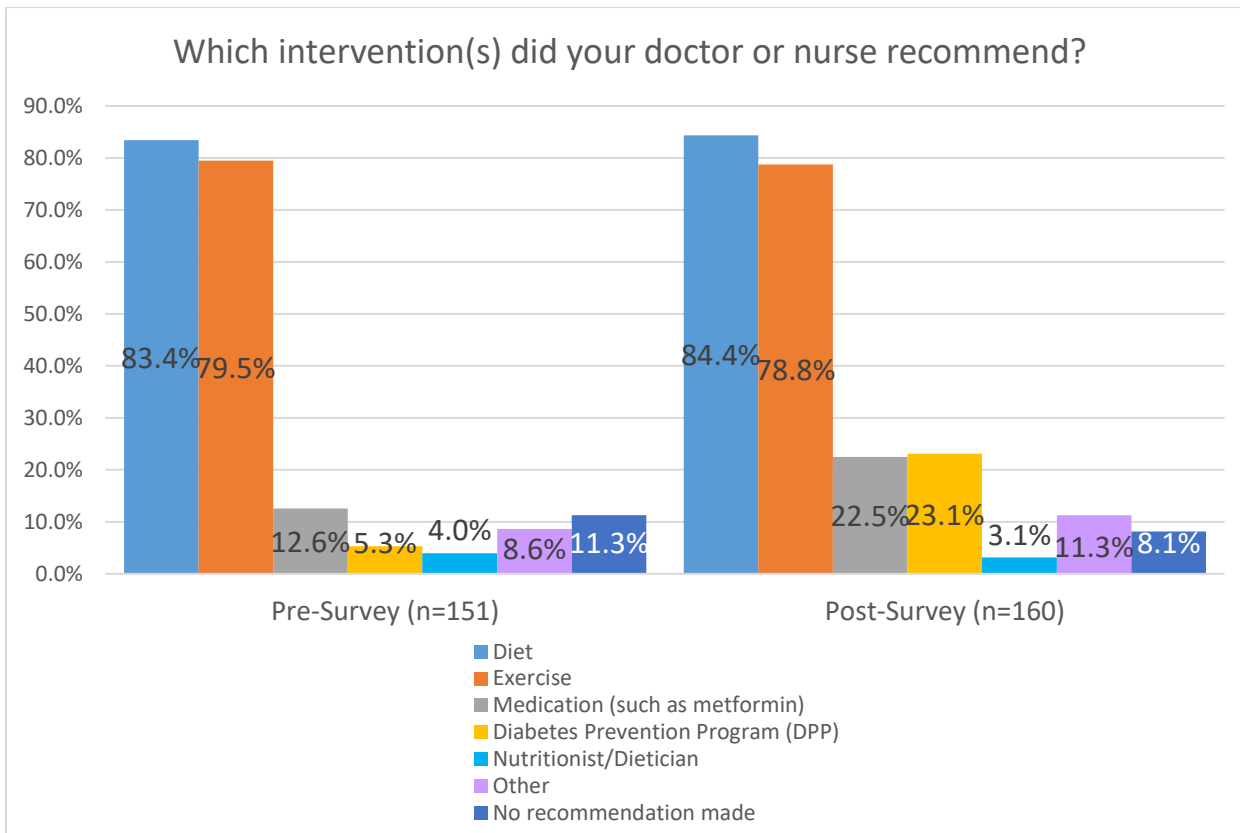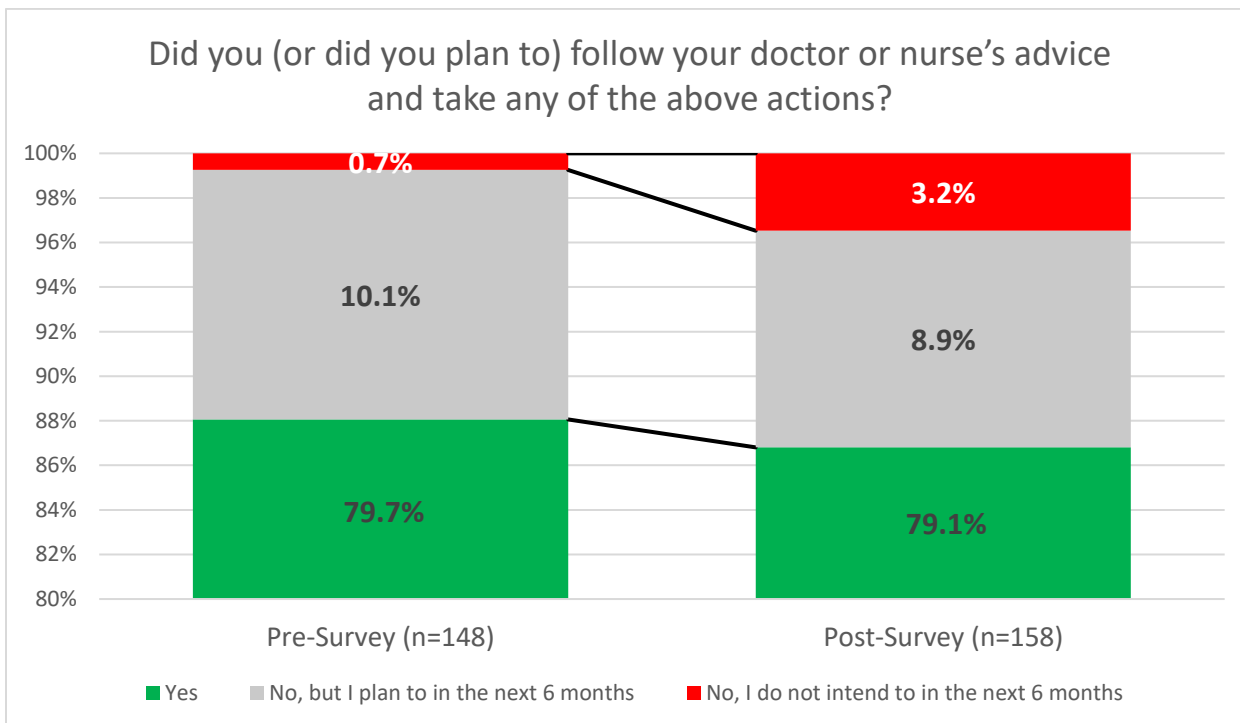

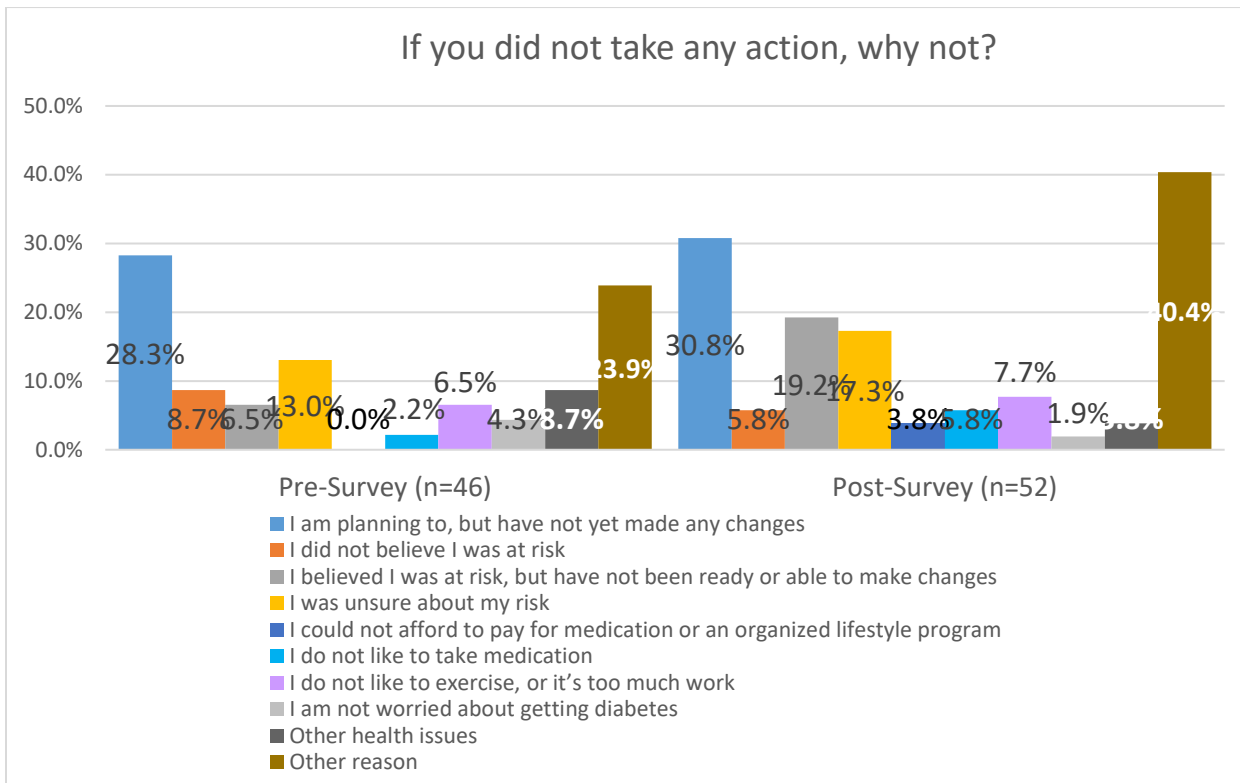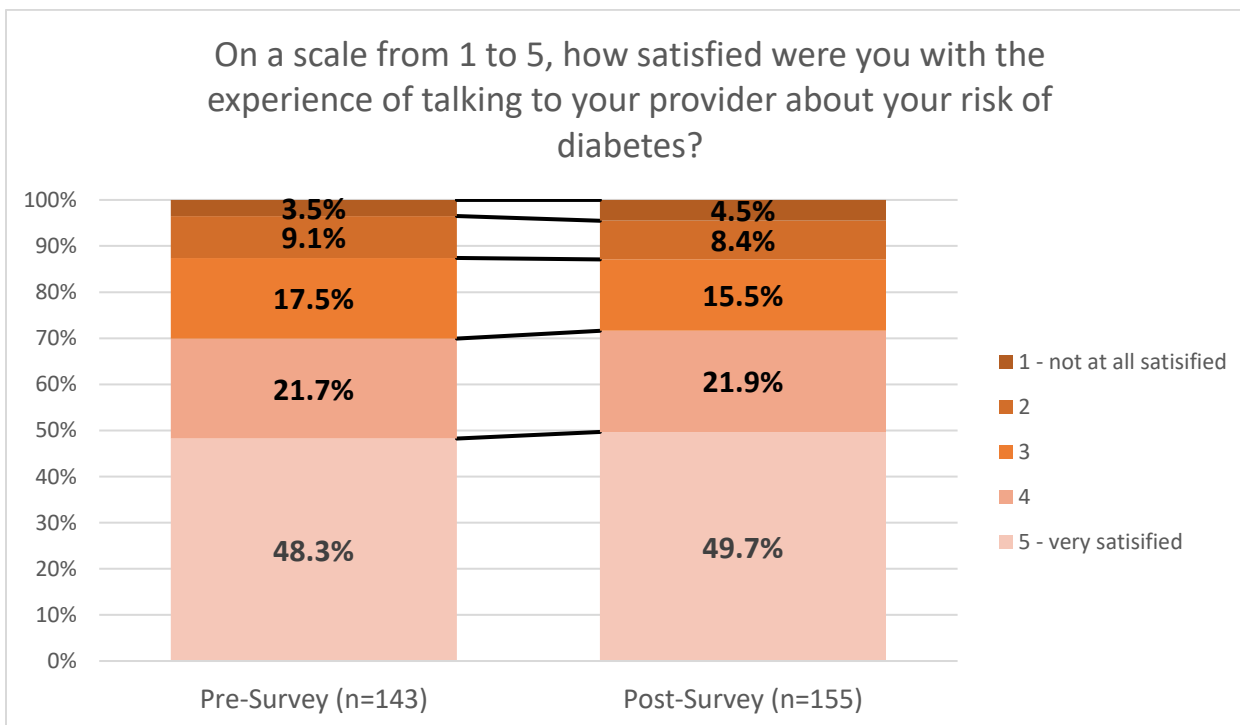

Supplement 4. Premier Provider Survey Results

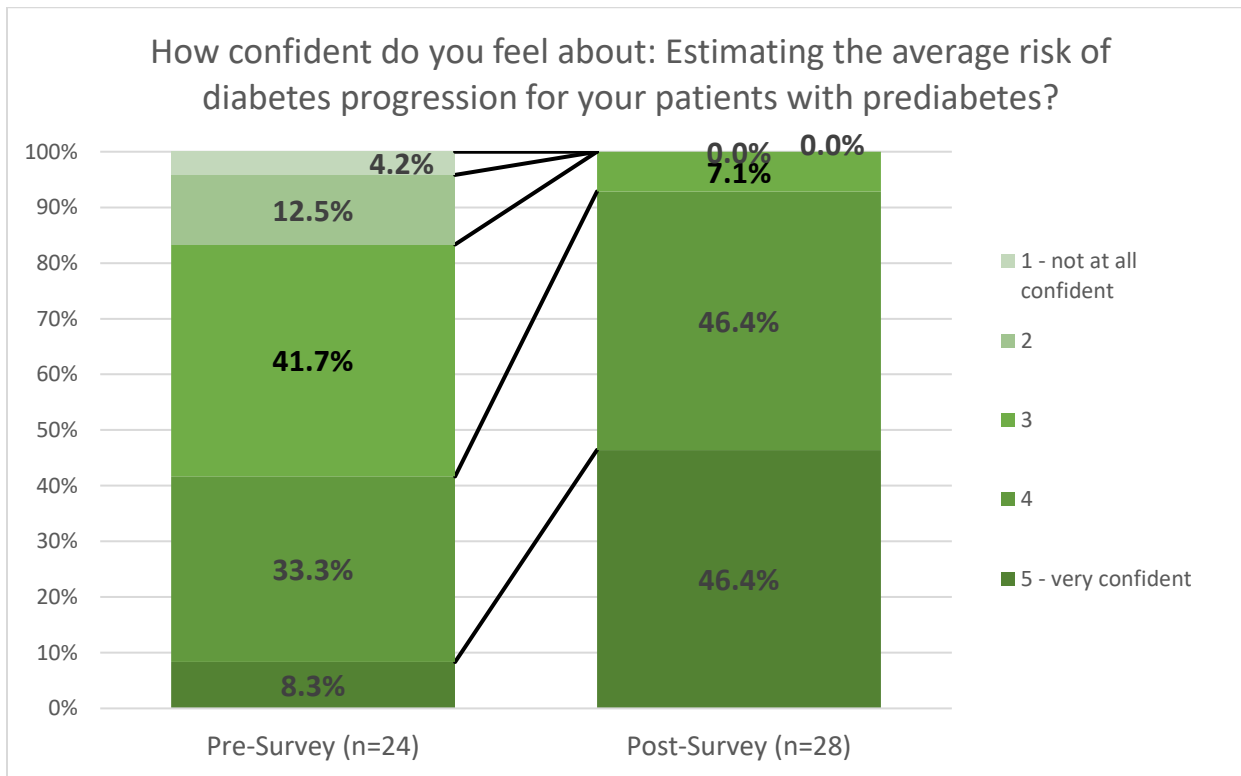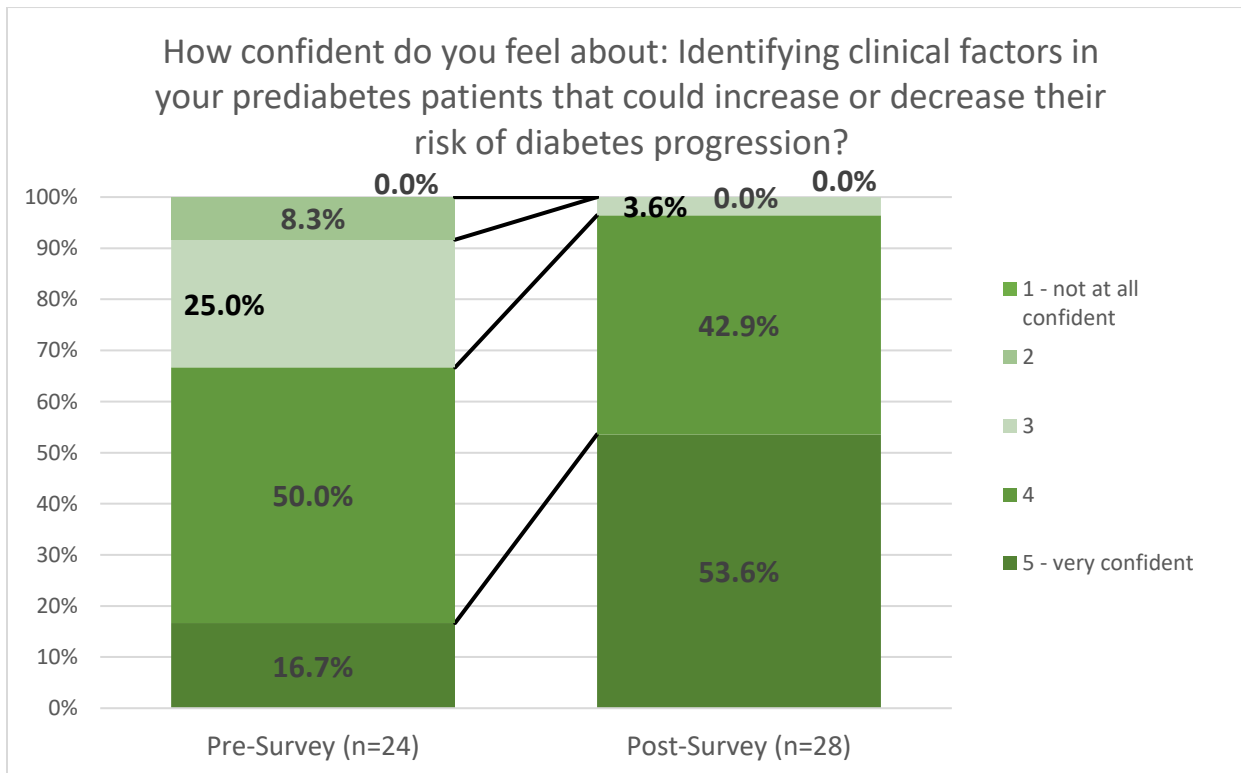

How confident do you feel about: Directly communicating the degree of benefit a prediabetes patient should anticipate if they attend a DPP lifestyle modification program or take metformin?

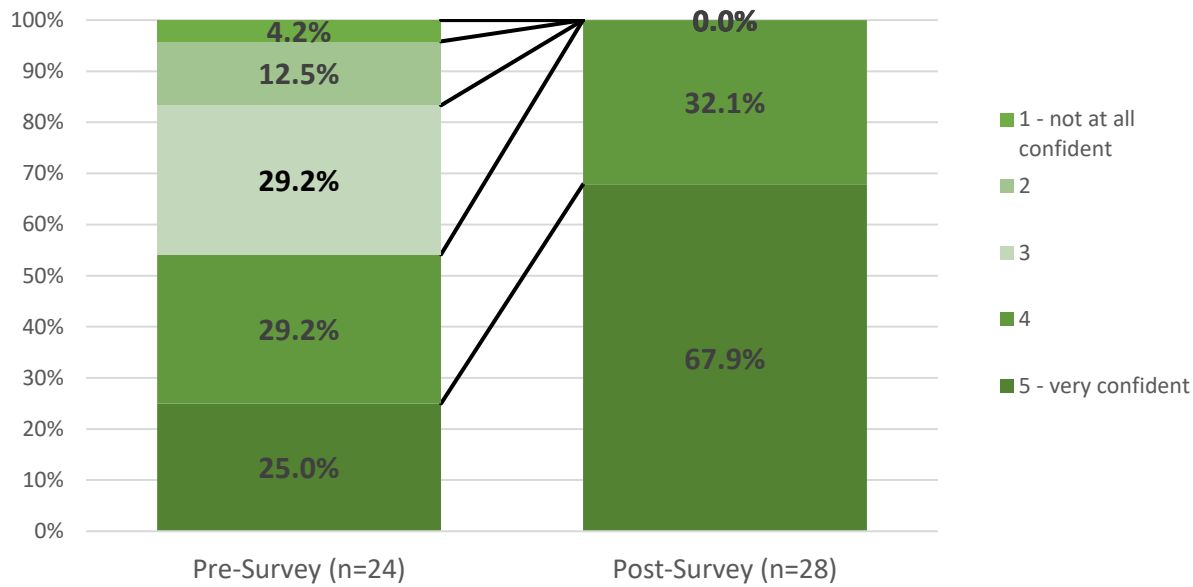

How confident do you feel about: Tailoring your recommendations for diabetes prevention to the general risk of an individual prediabetes patient?

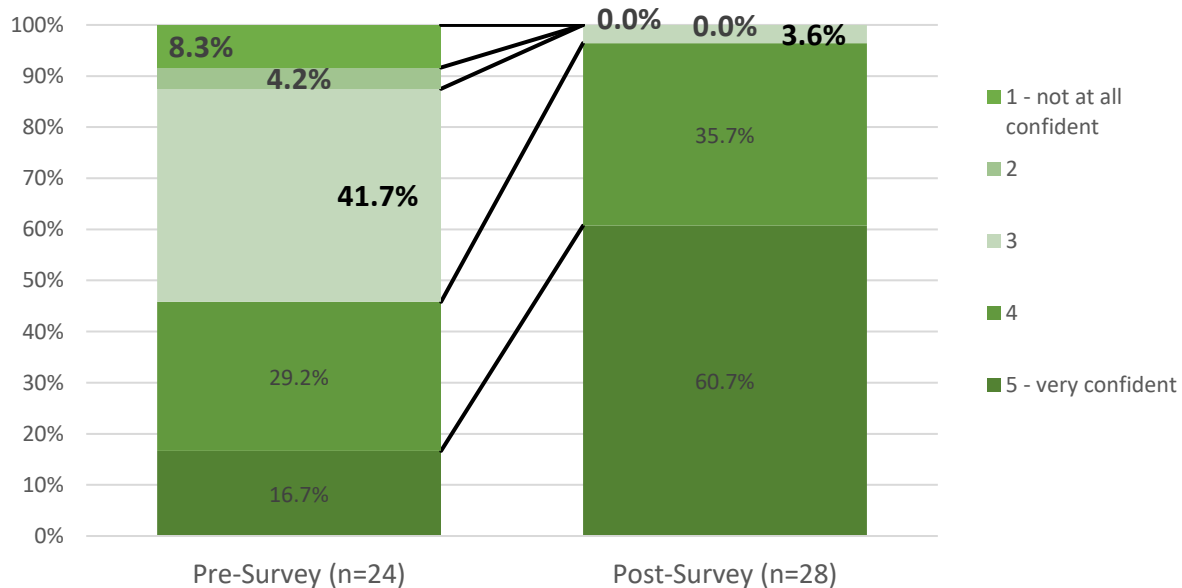



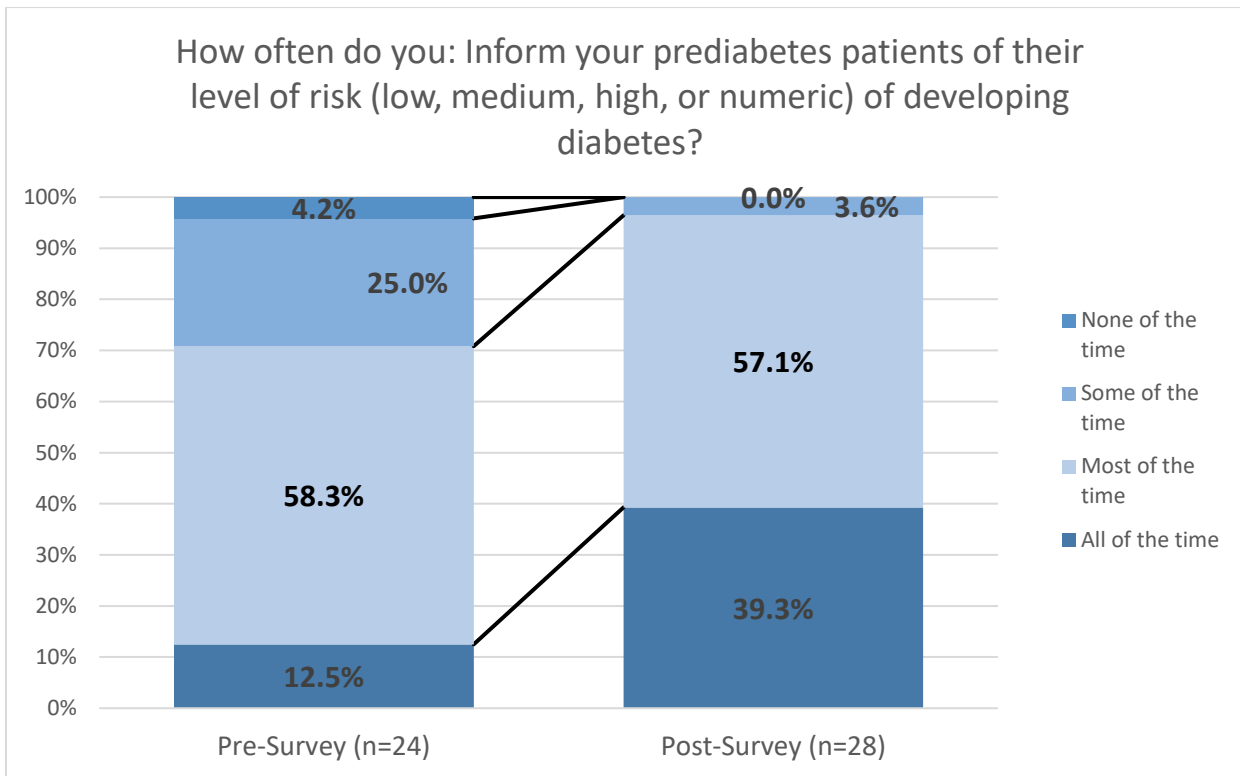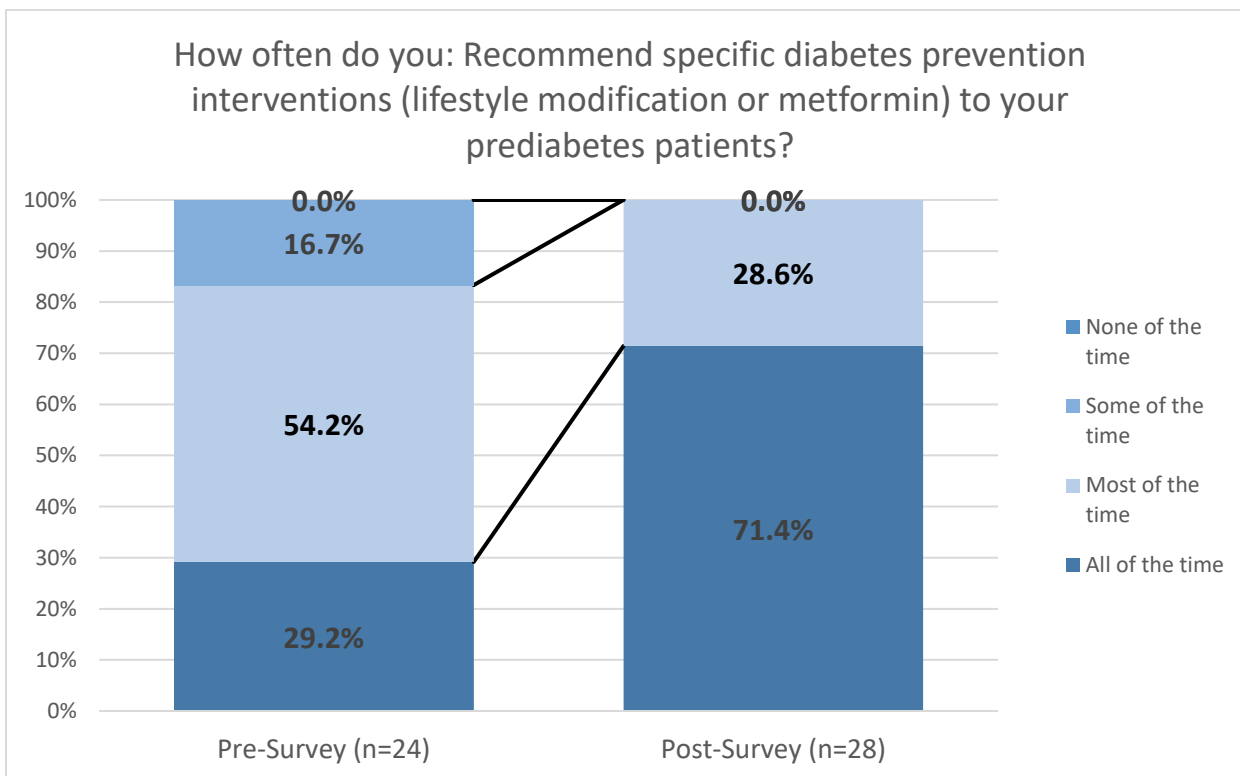

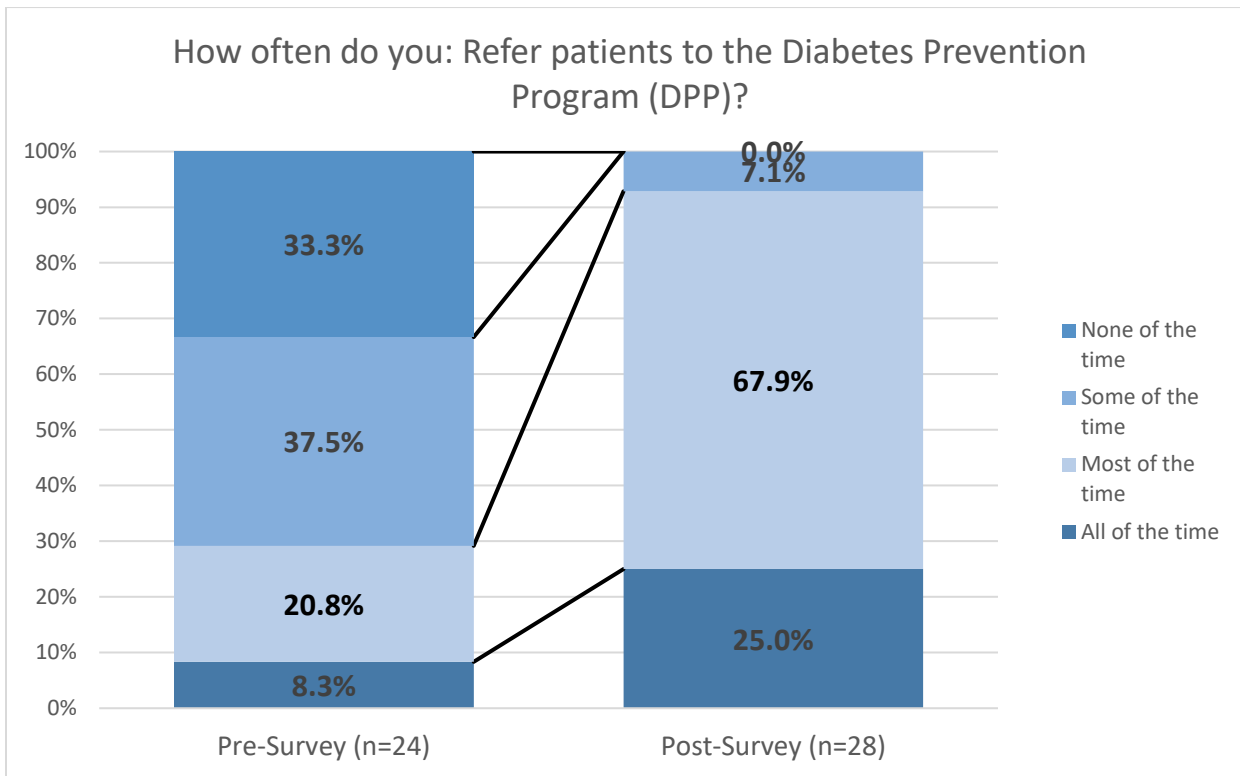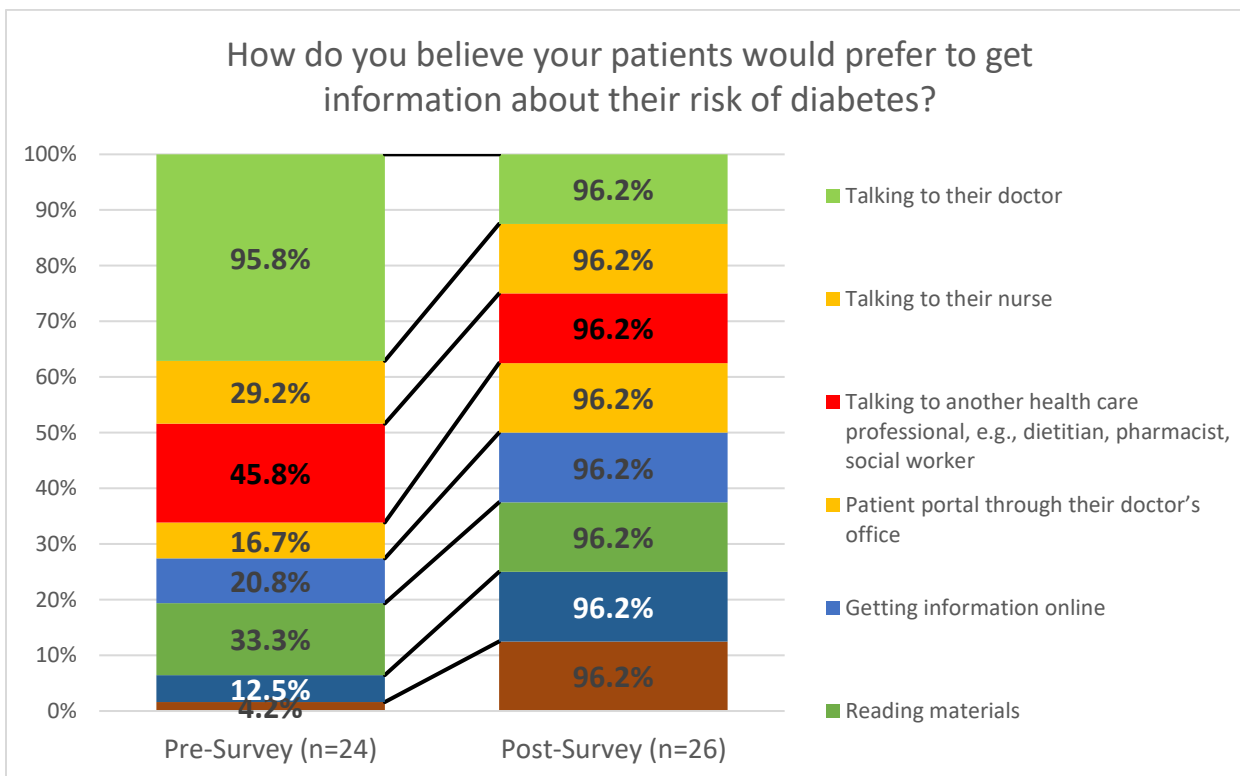

**Post Survey only**

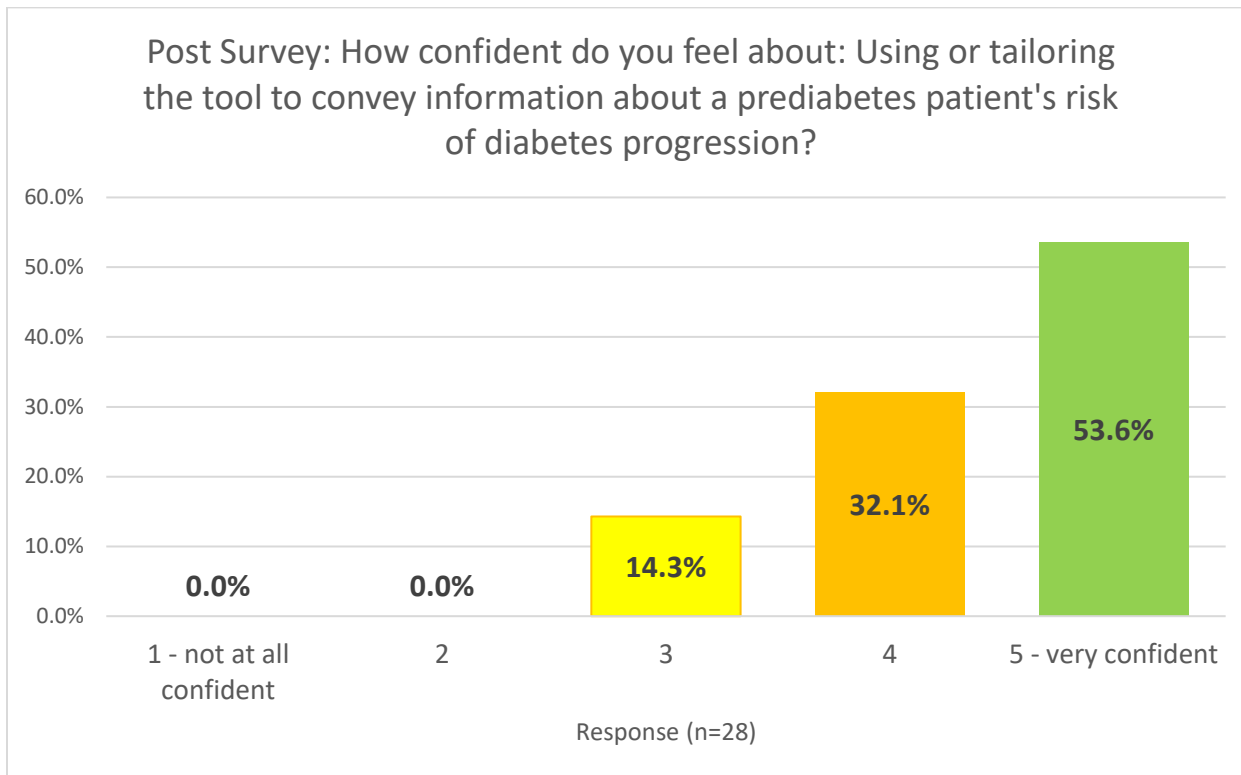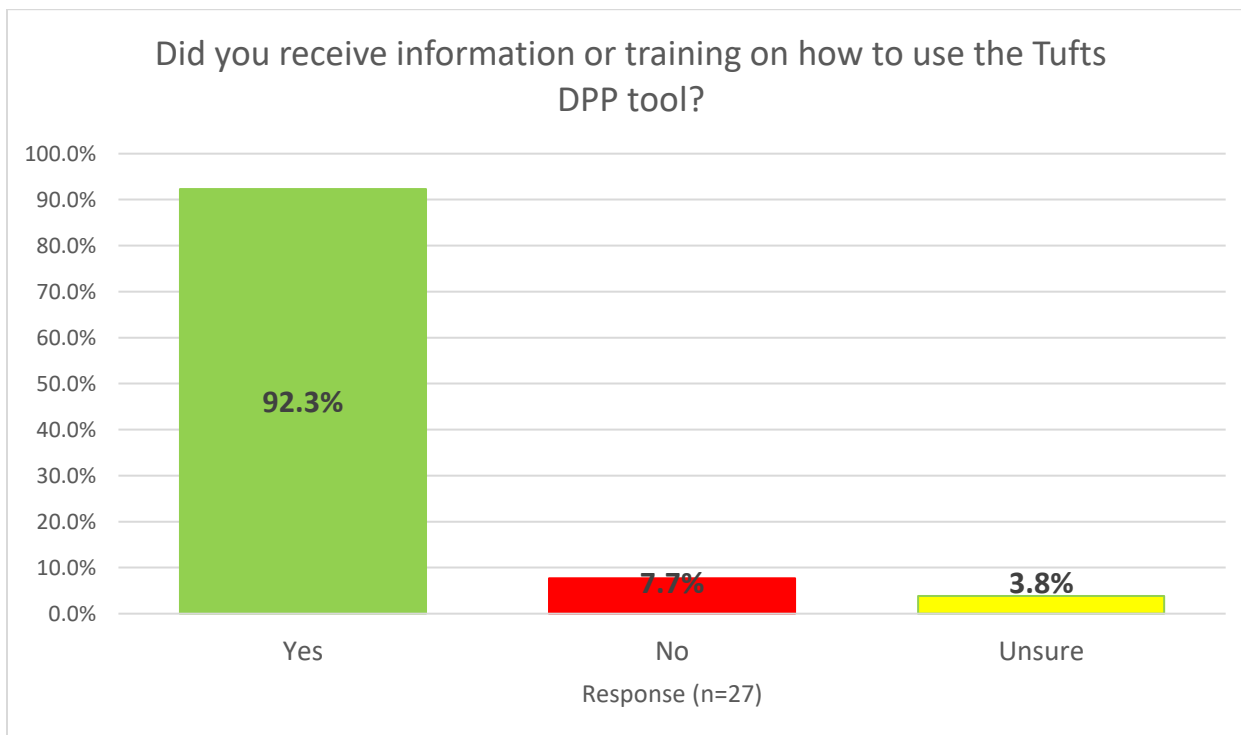

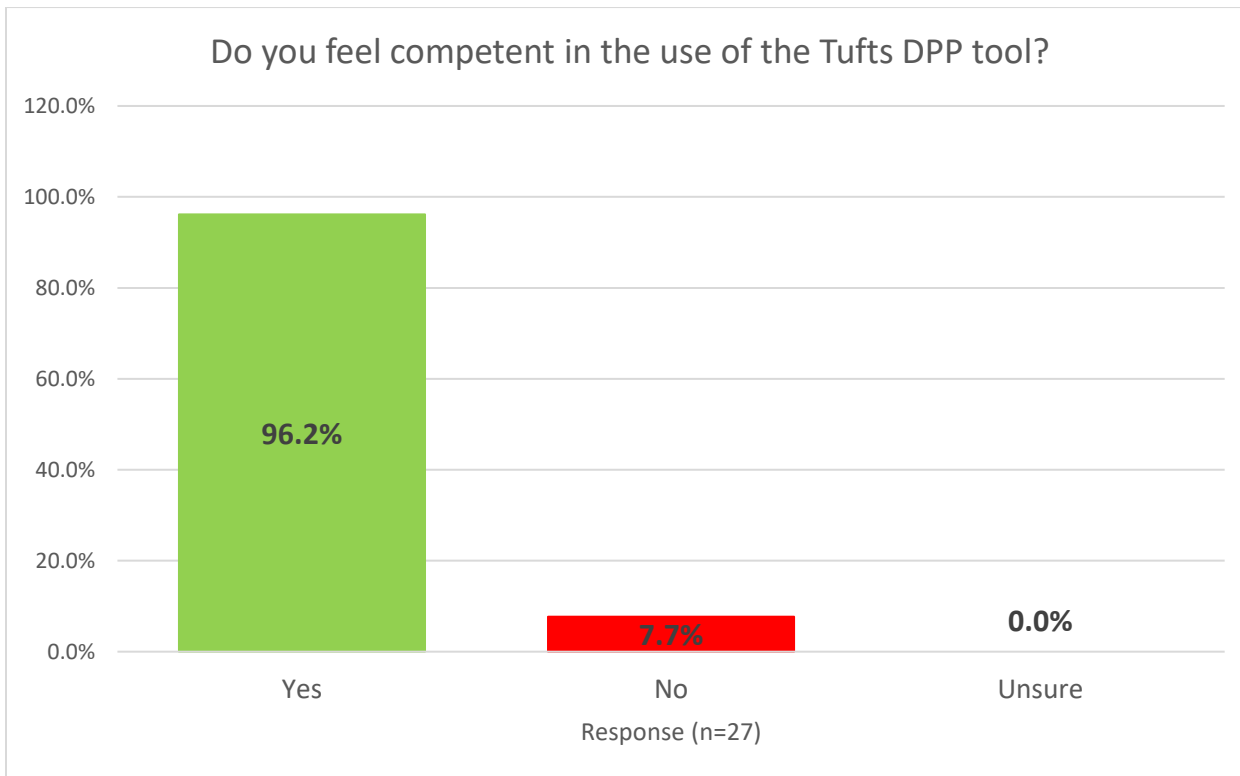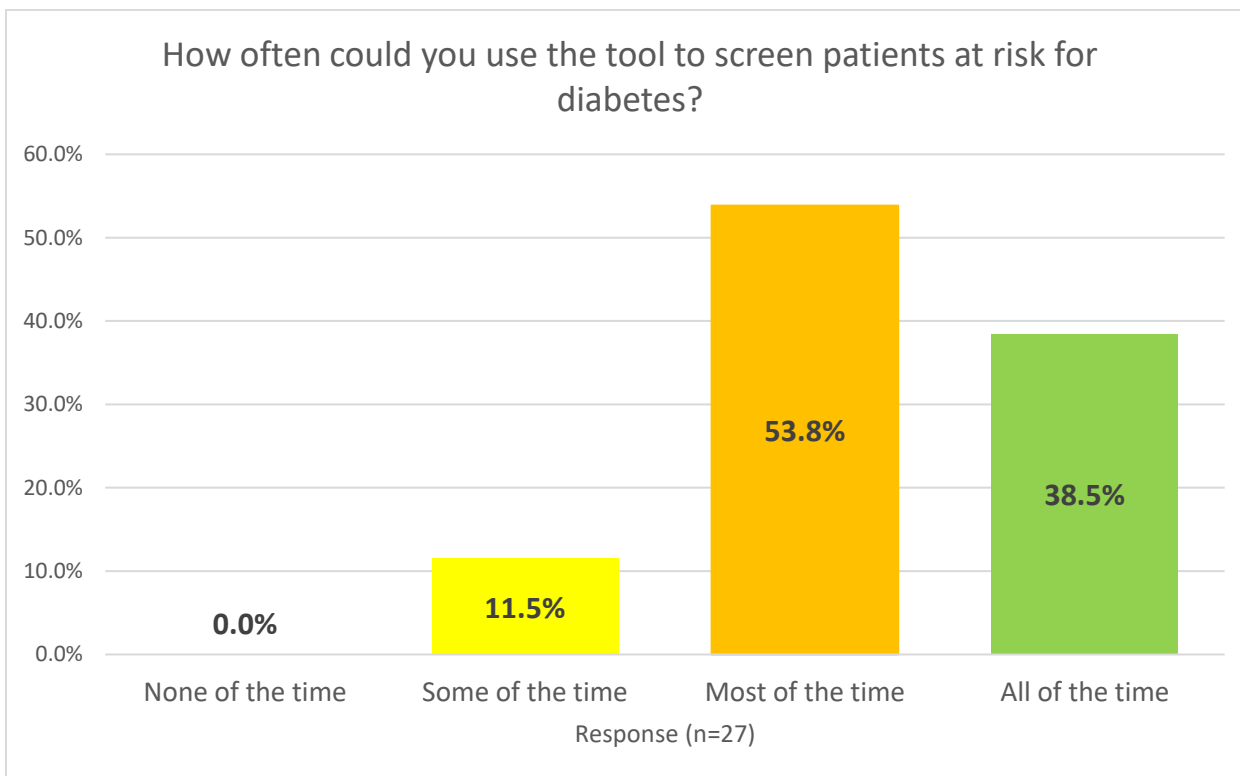

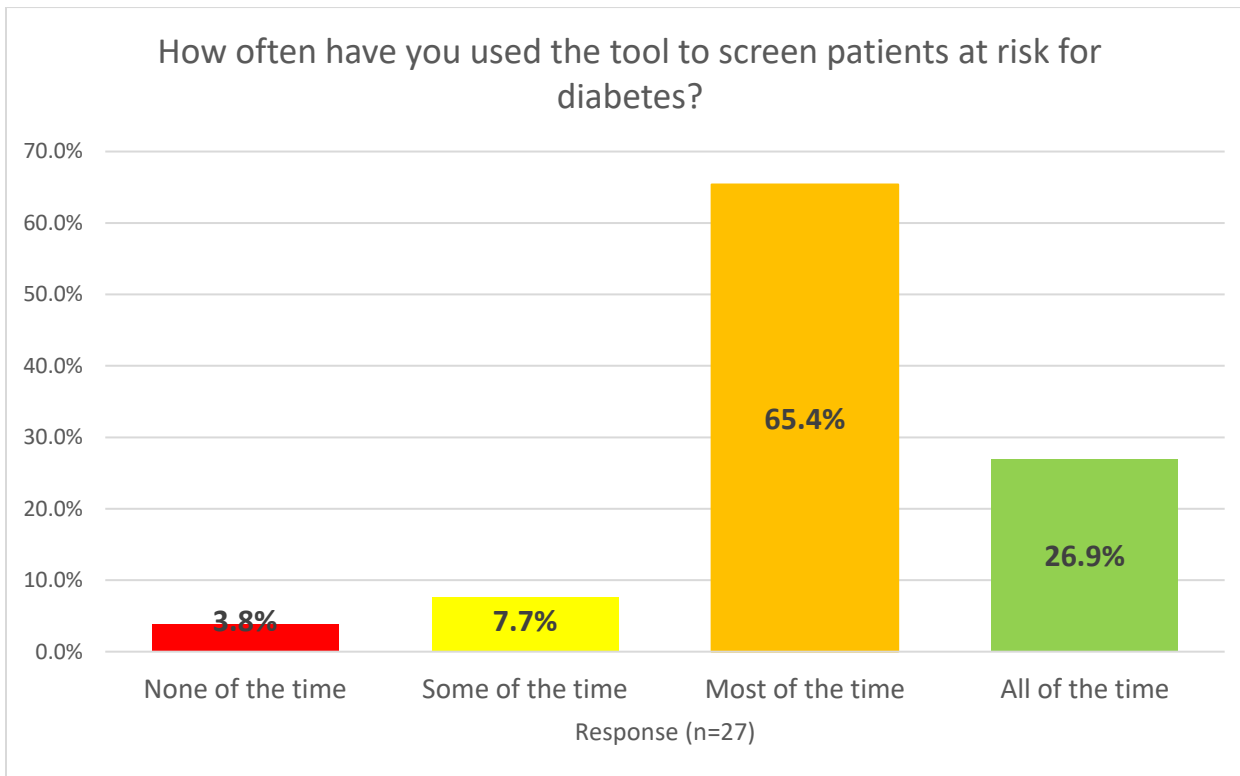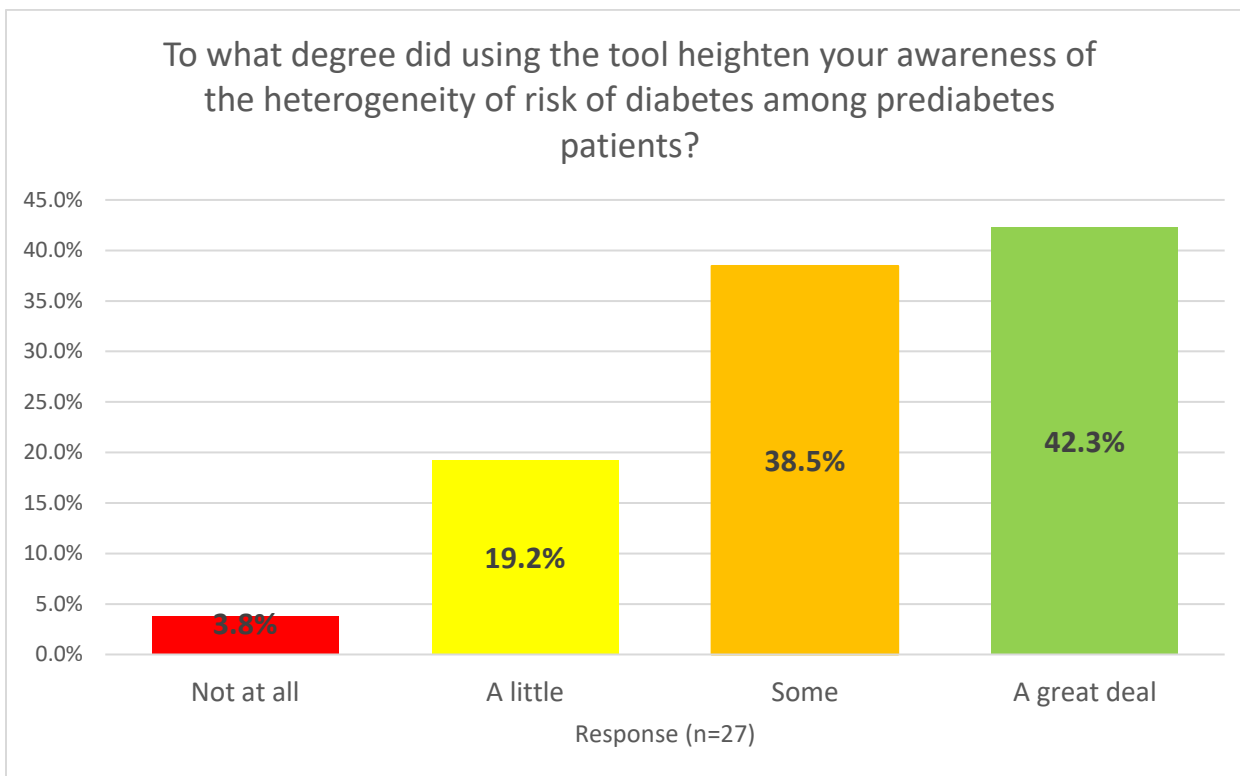

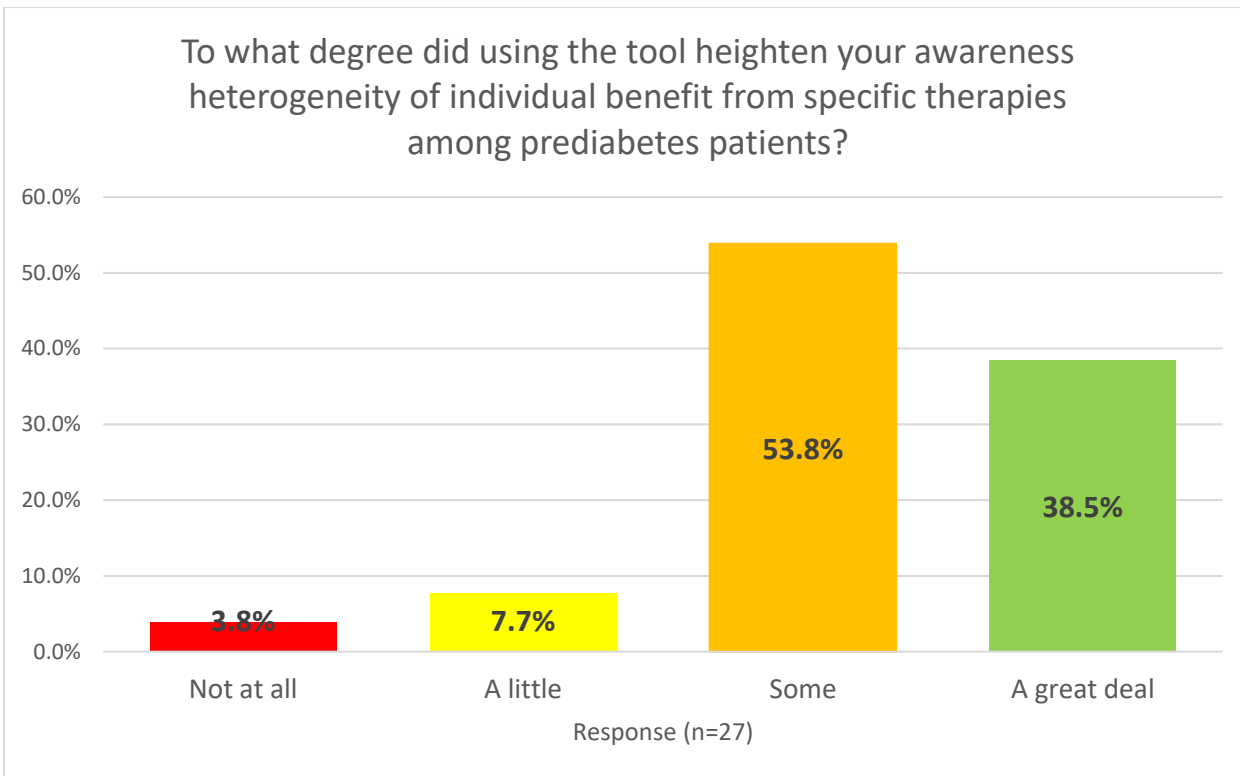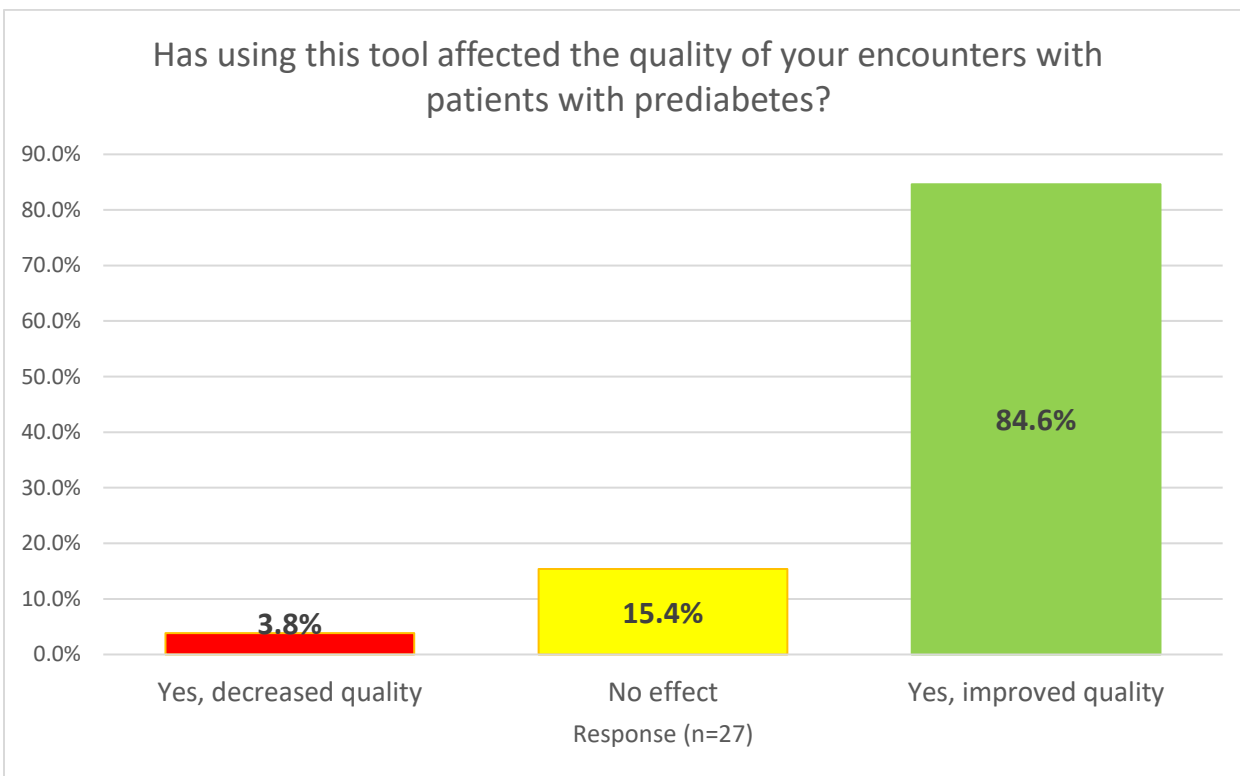

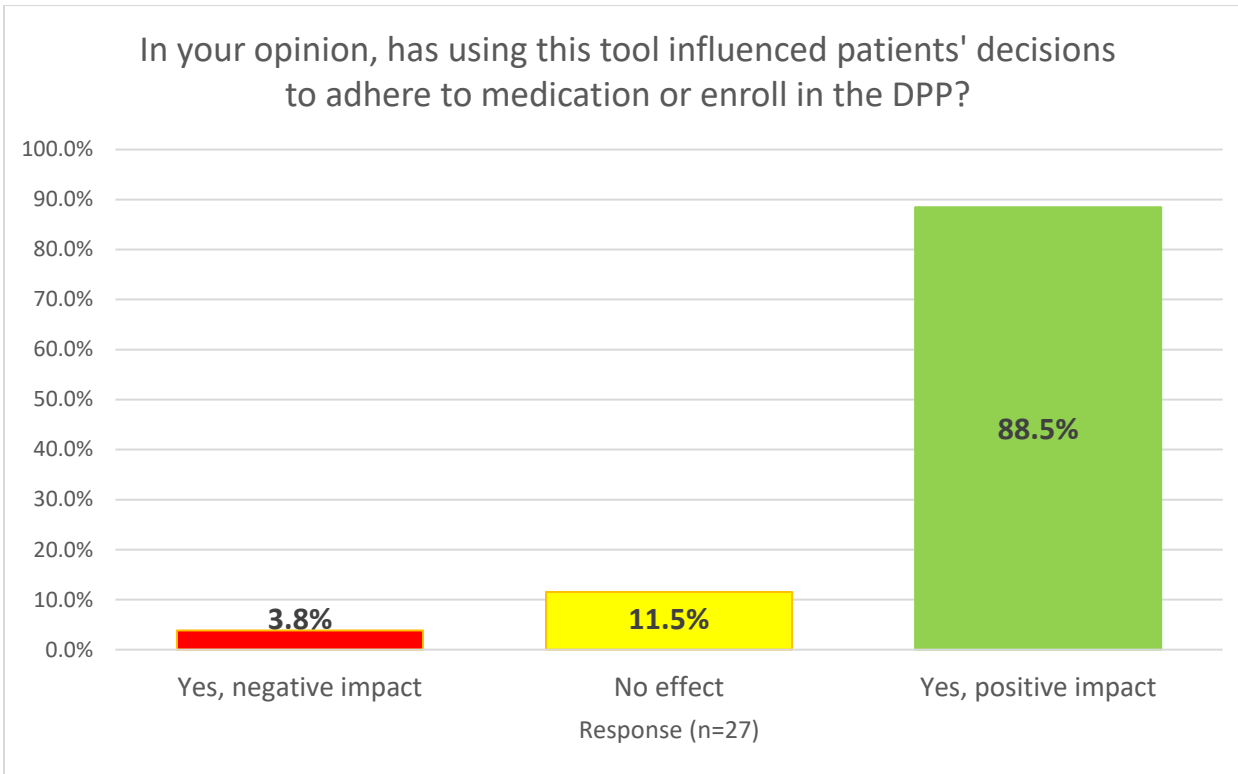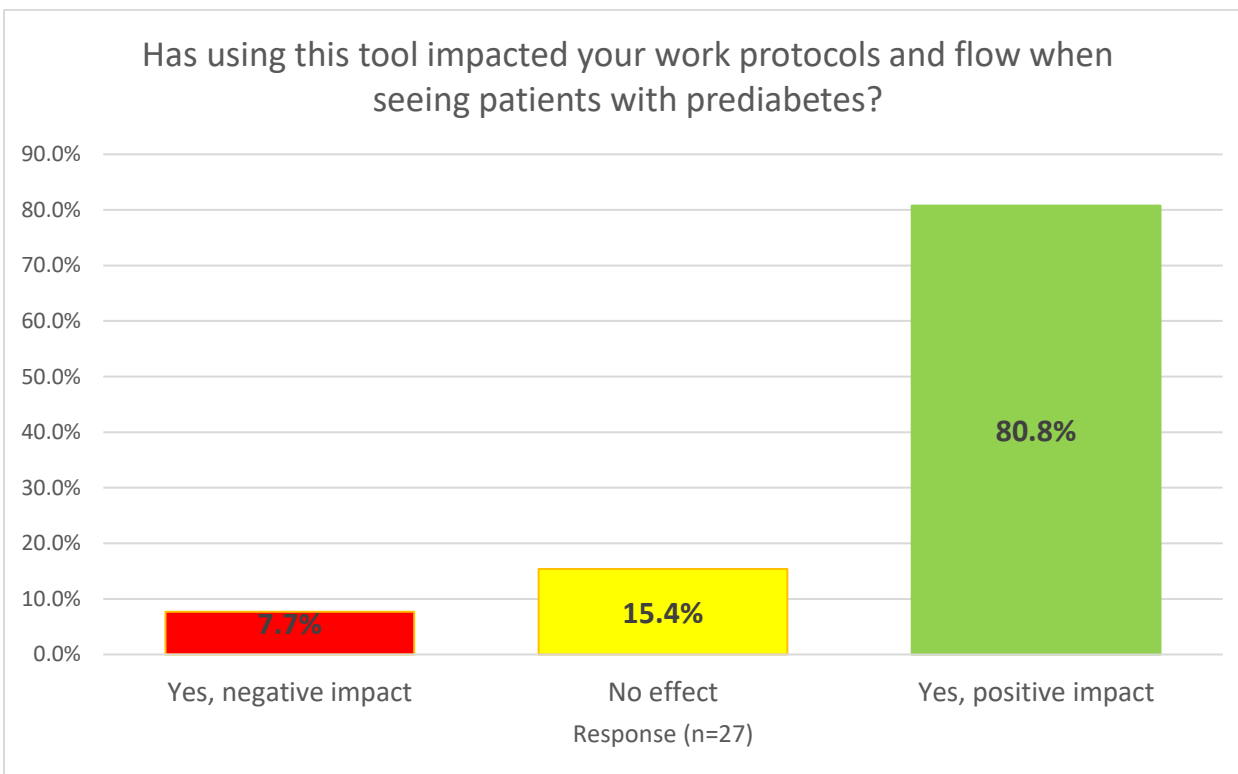

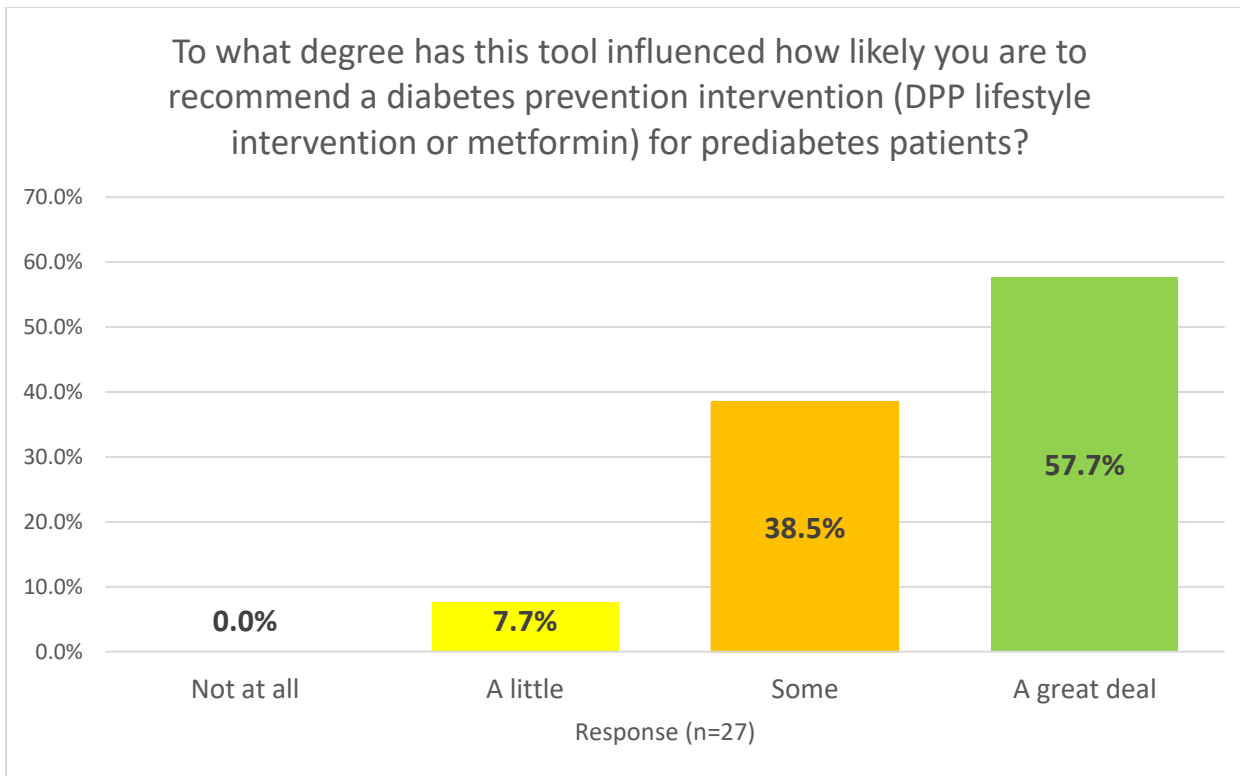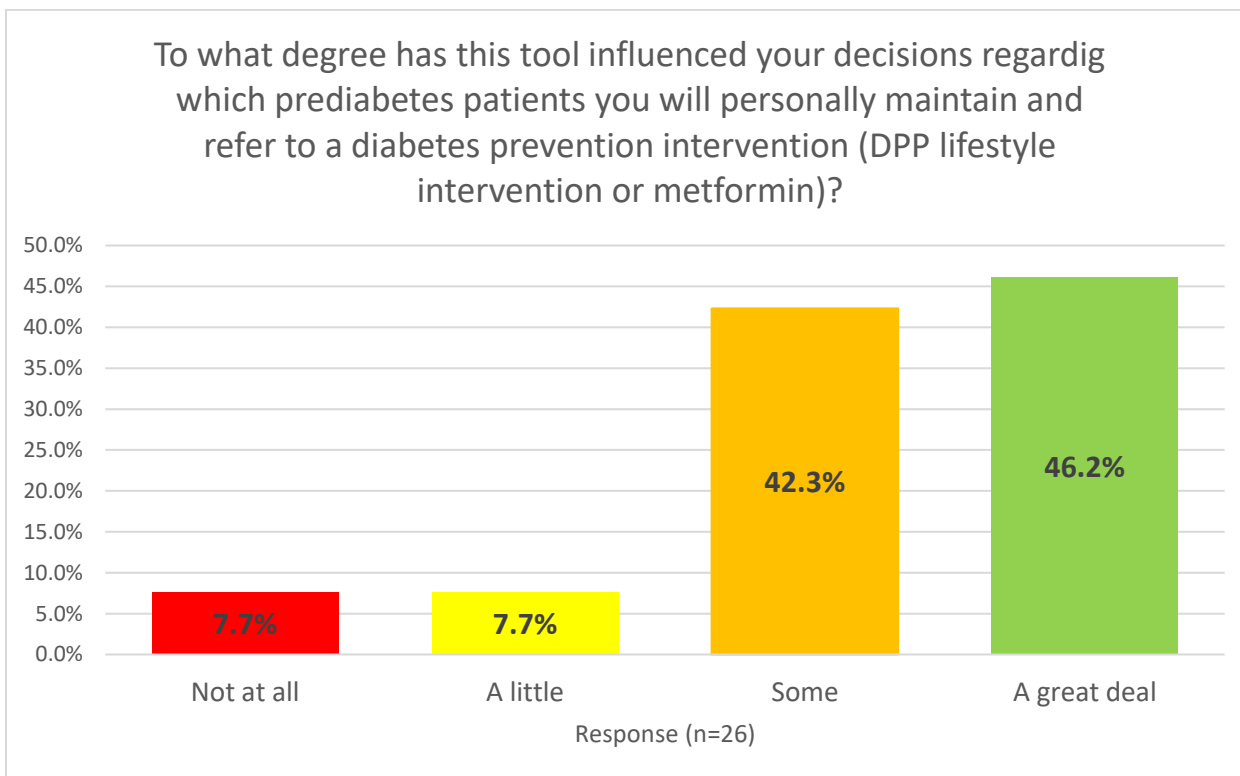

Supplement: Supplementary file [file media-1.pdf]
